# Supplementary material
Source: HighWire-hosted journal article supplement (http://www.cmajopen.ca/highwire/filestream/89441/field_highwire_adjunct_files/1/open-2022-0020-original-submission.pdf)
Supplement: open-2022-0020-original-submission.pdf [file open-2022-0020-original-submission.pdf]

## Potentially Avoidable Admissions to General Internal Medicine at an Academic Teaching Hospital

Alex M Cressman MD MSc<sup>1,2</sup>, Ushma Purohit HBSc<sup>1</sup>, Ellen Shadowitz<sup>2</sup>, Edward Etchells<sup>1,2,3</sup> MD MSc,  
Adina Weinerman MD MHSc<sup>1,2,3</sup>, Darren Gerson MBA<sup>1</sup>, Kaveh G Shojania MD<sup>1,2,3</sup>, Lynfa Stroud MD  
MEd<sup>1,2,4</sup>, Brian M Wong MD<sup>1,2,3</sup> and Steve Shadowitz MDCM MSc<sup>1,2</sup>

**Author Affiliations:** [1] Department of Medicine, University of Toronto, C. David Naylor Building, 6  
Queen's Park Crescent West, Third Floor, Toronto, ON, M5S 3H2; [2] Division of General Internal  
Medicine, Sunnybrook Health Sciences Centre, 2075 Bayview Avenue, Toronto, ON, M4N 3M5; [3]  
The Centre for Quality Improvement and Patient Safety (CQUIPS), 525 University Avenue, Toronto,  
ON, M5G 2L3; [4] Wilson Centre for Education Research, 200 Elizabeth Street, 1ES-565, Toronto,  
Ontario, Canada M5G 2C4

**Corresponding Author:** Alex M. Cressman MD MSc FRCPC, Temerty Faculty of Medicine, University  
of Toronto, Sunnybrook Health Sciences Centre; Phone: 416-480-6100;

[alex.cressman@mail.utoronto.ca](mailto:alex.cressman@mail.utoronto.ca)

**Word Count:** 2,492

**Tables:** 2

**Figures:** 1

**ABSTRACT**

**Background:** Identifying potentially avoidable admissions (PAAs) to overcrowded Canadian hospitals constitutes an important healthcare system goal. Because General Internal Medicine (GIM) accounts for 40% of hospitalizations, we sought to develop a method to identify PAAs and characterize contributing patient, provider, and system factors.

**Methods:** We defined PAAs as an admission that could be managed in an appropriate and safe-manner in the emergency department (ED) and/or ambulatory-setting. From Aug 2019-Feb 2020, we asked staff physicians to screen their admissions daily and flag candidate PAAs. For candidate PAAs, we prepared a chart summary supplemented by debriefs with members of the admitting team. We then reviewed each candidate PAA, assigned an admission avoidability score [1 (low) to 4 (high)], and developed a framework for identifying factors contributing to PAAs (scores  $\geq 3$ ).

**Results:** Staff physicians flagged 117/601 patients (19.5%) as candidate PAAs. Consensus-review identified 67 cases as PAAs (11.1%); these patients were younger (mean age 65 vs. 72;  $p < 0.05$ ), had fewer comorbidities (Case Mix Group+ level 0.42 vs. 1.14;  $p < 0.001$ ), lower resource-intensity weighting scores (0.72 vs. 1.50;  $p < 0.001$ ), and shorter length-of-stay (29 vs. 105 hours,  $p < 0.001$ ). Diagnostic/therapeutic uncertainty, perceived need for short-term monitoring, government directive of 4-hour limit for admission decision-making, and subspecialist request to admit were common factors.

**Interpretation:** Our prospective, real-time method of screening, flagging, and case-review showed that 1 in 9 GIM admissions were PAAs and identified contributing factors. Our method could be applied at other institutions to better understand their rate of PAAs and contributing factors to inform improvement endeavours.

## INTRODUCTION

Canadian hospitals are overcrowded, with occupancy often exceeding 100% and patients experiencing long wait-times in emergency departments (ED) for an inpatient bed. Concerns about an influx of patients throughout the COVID-19 pandemic and a backlog of unmet care have underscored the urgency of addressing hospital overcrowding. General internal medicine (GIM) patients account for nearly 40% of all hospitalizations and considerable healthcare costs per year.(1–4) Healthcare administrative data and anecdotal reports suggest that a portion of GIM hospitalizations are potentially avoidable admissions (PAAs),(5–13) defined as an admission that could be managed in a timely, effective, and safe-manner in the ED and/or ambulatory-setting. In addition to contributing to overcrowding, PAAs may expose patients to hospital-related harm, reduce hospital efficiency, and expend unnecessary resources.(10,14–16) Thus, identifying PAAs and their contributing factors represents a potentially important quality improvement (QI) goal.

Retrospective analyses of administrative data and physician interviews from the USA and UK suggest that greater than 22% of hospital admissions may be avoidable.(12,13,17,18) However, these studies typically focused on upstream preventive measures, which may have avoided the ED visit altogether, rather than care processes and decisions occurring during the actual ED care encounter. Many of these studies also did not explicitly examine patient, provider and institutional factors contributing to these avoidable admissions.

We developed a novel approach to more accurately identify PAAs at the time of ED presentation. We employed a prospective case-finding method to identify PAAs and tested our approach in a Canadian institution with a large GIM service (approximately 5,200 consults per year). As an additional goal, we characterized the patient, provider, and system factors associated with PAAs to inform improvement efforts.

## METHODS

### Study Setting and GIM Service Organization

We conducted this study at Sunnybrook Health Sciences Centre (SHSC), an academic tertiary care hospital in Toronto, Canada. The SHSC REB approved the study. Our GIM Division is composed of 16 GIM specialists and five subspecialists. At the time of the study, our institution had 110 inpatient GIM beds distributed across five GIM teams. Each team is composed of a staff physician, internal medicine (IM) and other resident physicians, and medical students. A team census typically consists of 15-22 patients. In the 2018-2019 academic year, our GIM service received 5,200 requests for ED consults resulting in 4,339 hospitalizations.

### ED Consultation Workflow

During daytime hours (Monday-to-Friday, 0800h-1700h), senior IM resident physicians receive consult requests from ED physicians, assess patients, and review consults with a staff physician in real-time to determine the care plan (admission, transfer to another service, or discharge). During evenings, nights, weekends, and holidays, senior IM residents receive consult requests from ED physicians, assess patients with assistance from junior residents and medical students, then independently decide on a care plan. Staff physicians are available by phone with access to the electronic medical record (EMR) but are typically not in hospital providing care between 5PM-8AM. Senior IM residents are required to contact the on-call staff physician if they plan to discharge a patient, but will typically not engage in contact on evenings, nights, weekends, or holidays if the decision is to admit.

### Screening and Flagging of Potentially Avoidable Admissions

Our process screened GIM admissions from the preceding 24 hours and excluded patients transferred from another institution, admitted from clinic, or from ICU or a surgical service. Each morning, 7 days/week, we randomly selected two GIM teams and e-mailed staff physicians at 0800h with a pre-populated list of their admissions, asking them to flag candidate PAAs.

We defined a candidate PAA as a patient presentation that could be managed in a timely, effective, and safe manner in the ED and ambulatory-setting. We asked staff physicians to provide a one-to-two sentence rationale for flagging and encouraged a low threshold to flag candidate PAAs to make case-finding as inclusive as possible during this initial phase. If a response was not received within 24 hours of the initial request, follow up correspondence was sent from a study team member (AMC).

### Case Synthesis and Clinician Debrief

For each flagged PAA, one of us (AMC) reviewed the admission consultation note, investigations, and other consultations up to the time of admission to prepare a chart summary. One of us (AMC) conducted a semi-structured debrief with the admitting resident physician within 24-48 hours of admission date. Here, we explored case details, admission rationale, and discussed contributing patient, provider, and system factors.

### Research Team Case Review

At least three members of the research team (AMC, EE, AW, KGS, LS, BMW, SS) met weekly and reviewed case summaries of flagged PAAs along with data obtained from debriefs. The research

1  
2  
3 team was blinded to admitting residents, staff physicians, date of admission, and admission team. If  
4  
5 a team member had been the most responsible physician for the candidate PAA, they were  
6  
7 withdrawn from discussion.  
8  
9

10  
11  
12 We developed a scale adapted from prospective surveillance studies of adverse events to  
13  
14 estimate the degree of avoidability of each candidate PAA (1 = virtually no evidence of avoidability, 2  
15  
16 = avoidability not likely, 3 = avoidability likely, and 4 = virtually certain evidence of avoidability).(19)  
17  
18 We used prompts (e.g., “if you were seeing this patient in your outpatient GIM clinic, would you  
19  
20 refer this patient to the ED to be admitted?” and “would more than 50% of your colleagues admit  
21  
22 this patient to hospital?”) to resolve disagreement among team members. A final decision of  
23  
24 avoidability was determined by consensus. For candidate PAAs with avoidability scores of  $\geq 3$ , we  
25  
26 reviewed and discussed patient, provider, and system factors (Table 2 & Appendix 1). Our data  
27  
28 collection methodology is displayed in Figure 1.  
29  
30  
31  
32  
33

### 34 Baseline Characteristics

35  
36  
37  
38  
39 We gathered patient data including age, gender, comorbidities using comorbidity-level  
40  
41 from CIHI-Case Mix Group (CMG) scores,(20) time and date of admission, consult volumes on date of  
42  
43 admission and in preceding 48 hours, length of stay (LOS), healthcare resource utilization (measured  
44  
45 by resource-intensity weighting (RIW) scores, a relative value measuring total patient healthcare  
46  
47 resource use compared with average typical acute inpatients),(21) along with medical imaging [CT  
48  
49 head, MRI brain/spine], and discharge destination (Table 1).  
50  
51  
52  
53

### 54 Statistical Analysis

1  
2  
3 We used Chi-square (for categorical variables) or Mann-Whitney U (for continuous variables)  
4 tests to assess differences between PAA and non-PAA groups. Analyses were completed using SPSS  
5 version 27 software (IBM, Armonk, New York, USA). Statistically significant findings were defined as  
6  
7  
8  
9  
10  $p < 0.05$ .

## 11 12 13 14 **RESULTS**

15  
16  
17  
18 We screened 601 (57%) of 1,048 ED admissions to GIM between August 2019-February  
19 2020. The cohort had a mean age of 71 years (SD 18) and 53% were female. Of the 601 admissions  
20 included in our study, 83 (14%) occurred during daytime (0800h to 1700h) while 518 (86%) occurred  
21 in the evening and overnight period, reflecting the timing of receipt of consultations and admissions  
22 by our GIM service. Admission data, baseline characteristics, LOS, healthcare utilization, and  
23 discharge destination are displayed in Table 1.  
24  
25  
26  
27  
28  
29  
30  
31  
32  
33

34 Our method achieved a 100% response rate within 48 hours of request for case-flagging  
35 from staff physicians and case debriefings with the admitting IM residents. To ensure PAAs were not  
36 excluded during screening, members of the research team (AMC, SS) independently reviewed a  
37 random sample of 30 unflagged cases where only 1/30 constituted a candidate PAA, suggesting that  
38 attending physicians captured the vast majority of candidate PAAs. Of the 601 patients screened,  
39 117 (19.5%) were flagged by staff physicians as candidate PAAs. After consensus review, 67 (11.1%;  
40 95% CI: 8.8% to 13.9%) were deemed PAAs. Approximately 20 minutes was spent for each flagged  
41 PAA to examine the electronic medical record, conduct chart review, debrief with IM residents, and  
42 review with our research team.  
43  
44  
45  
46  
47  
48  
49  
50  
51  
52  
53

54  
55  
56  
57 Compared to non-avoidable admissions, consensus PAAs were younger (mean age 65 vs. 72  
58 years,  $p < 0.05$ ), had fewer comorbidities (CMG+ 0.49 vs. 1.16,  $p < 0.001$ ), and had shorter median LOS  
59  
60

1  
2  
3 (29 hours vs. 105 hours,  $p<0.001$ ) (Table 1). There was no relationship between avoidability and  
4  
5 gender, time of admission (daytime vs. evening/night), day of admission (weekdays vs. weekends),  
6  
7 or working hours (Monday to Friday 0800h to 1700h) vs. evening and weekends (all  $p>0.05$ ) (Table  
8  
9 1). The average RIW score (SD) for consensus PAAs was 0.72 (0.42), compared to 1.51 (2.69) for non-  
10  
11 avoidable admissions ( $p<0.001$ ), suggesting lower healthcare resource utilization among PAAs.  
12  
13  
14  
15

16  
17 Table 2 summarizes the patient, provider, and system factors that contributed to PAAs in our  
18  
19 study. The most frequently occurring contributing factors to PAAs include diagnostic/therapeutic  
20  
21 uncertainty ( $n=38$ ), perceived need for short-term monitoring ( $n=32$ ), government directive for 4-  
22  
23 hour limit for admission decision-making in the ED ( $n=28$ ), and subspecialist request to admit ( $n=22$ ),  
24  
25 (Table 2).  
26  
27  
28  
29

## 30 **DISCUSSION**

31  
32  
33  
34  
35 In this prospective study of admissions to GIM at a tertiary care academic teaching hospital,  
36  
37 we found that 1 in 9 were deemed potentially avoidable. Our method of active surveillance and case  
38  
39 ascertainment was effective in identifying PAAs, had high participant engagement, and may help to  
40  
41 inform quality improvement and medical education ideas. We estimate that nearly 480  
42  
43 hospitalizations (i.e., 11% of 4,339 admissions) and over 500 GIM hospital bed-days per year could  
44  
45 be potentially avoided at our institution alone. Our work is timely given the healthcare constraints  
46  
47 imposed by the COVID-19 pandemic and as we begin to address the backlog of services due to  
48  
49 delayed care.(22,23) Our method could be applied at other institutions to better understand their  
50  
51 rate of PAAs and local contributing factors.  
52  
53  
54  
55

56  
57 In contrast to prior studies investigating avoidable admissions, we used a prospective case-  
58  
59 specific method focused on avoidability at the time of presentation and involved frontline physicians  
60



1  
2  
3 who made the admission decision. Our estimate of avoidability (11%) was lower than those  
4  
5 previously found in the USA and UK for several reasons.(12,13,17,18) Our definition of an avoidable  
6  
7 admission considered only factors relevant to the care encounter once a patient arrived in our ED  
8  
9 rather than upstream factors such as access to physicians in the days preceding hospitalization. This  
10  
11 may have led to a narrower cohort of patients identified. Other institutional programs already exist  
12  
13 to divert patients from the ER to avoid hospitalization, such as rapid outpatient clinics for GIM,  
14  
15 stroke, and cardiology, among others.(24) Lastly, physicians may have been less inclined to flag cases  
16  
17 as PAAs due to concern for judgement about the decision to admit where care might have been able  
18  
19 to be managed as an outpatient. However, we feel this is a minor contributor given our institutional  
20  
21 culture with a focus on QI (i.e., patient safety, morbidity & mortality rounds, division members  
22  
23 formally appointed in QI, and past/current chief residents supported to pursue QI training). We also  
24  
25 found a very low rate of missed PAAs among unflagged cases (1 of 30).  
26  
27  
28  
29  
30  
31

32 From debriefs with resident physicians, we were able to better understand the admission-  
33  
34 process and decision-making factors beyond those documented in the EMR. Our consensus review  
35  
36 process helped to identify factors contributing to PAAs including diagnostic and therapeutic  
37  
38 uncertainty, perceived need for short-term patient monitoring, hospital 4-hour time limit for  
39  
40 admission decision-making in the ED, and a subspecialist recommendation to admit. These factors  
41  
42 have been reported previously in studies from other jurisdictions.(12,13,17,18) Of note, previously  
43  
44 identified factors such as lack of access to outpatient/specialist care, community-based resources,  
45  
46 and patient/social factors such as isolation, mental illness, or lack of housing were not commonly  
47  
48 cited. This may reflect the demographic composition of our patient population or rapid access to  
49  
50 allied healthcare specialists within our ED.  
51  
52  
53  
54  
55  
56

57 To reduce the prevalence of PAAs, educational initiatives for resident physicians focused on  
58  
59 understanding and coping with uncertainty could be explored.(25–27) Improved orientation to local  
60

1  
2  
3 resources and briefing on scope and capacity for outpatient GIM workup and management may also  
4  
5 help ease clinical uncertainty. To address a subspecialists recommendation to admit, which may  
6  
7 occur more often outside usual working hours when GIM is overseen by junior trainees, resident and  
8  
9 staff physicians may need to engage in earlier discussion to determine if workup can be feasibly  
10  
11 completed on an outpatient basis. However, this must be balanced with the educational value of  
12  
13 graded autonomy and independent decision-making throughout IM training.  
14  
15  
16  
17  
18

19 We found that nearly half of PAAs were for diagnoses such as mild congestive heart failure,  
20  
21 chronic obstructive pulmonary disease, and acute kidney injury. These conditions could be amenable  
22  
23 to short-term observation (<12 hours) in the ED with outpatient follow up. ED observation units or  
24  
25 “hospital-at-home” programs have been used in other jurisdictions with varying effectiveness,(28–  
26  
27 32) however most do not involve direct GIM consultation. Our findings also highlight a potential  
28  
29 benefit of developing rapid care pathways. For example, for a new diagnosis of multiple sclerosis,  
30  
31 urgent access to MRI imaging, administration of medications, and referral to subspecialty clinics  
32  
33 could take place on an outpatient basis, potentially negating need for hospitalization.  
34  
35  
36  
37  
38

39 Strengths of our study include the prospective nature of data collection, real-time  
40  
41 debriefings, and consensus review. Our process, modelled after trigger-tool methodologies and  
42  
43 prospective surveillance of adverse events,(19,33) allowed for detailed review of workflow and  
44  
45 processes that would be unavailable from administrative data or delayed review. Our debriefing  
46  
47 process with residents was case-based, brief, and illustrated the practicality of our method. While  
48  
49 our results reflect the unique experience of a tertiary care academic teaching hospital, our method  
50  
51 for identifying and classifying PAAs could be adapted and applied to any GIM service in Canada.  
52  
53  
54  
55  
56

57 Our study has limitations. Cohort collection and data extraction was time-intensive and  
58  
59 could be improved through an EMR-based flag for PAAs. As nearly 60% of flagged PAAs were  
60

1  
2  
3 confirmed via consensus, an initial EMR-embedded screening tool for avoidability might allow  
4 scalability. Our efforts likely did not need to be sustained as our data saturated before completion of  
5 data collection. We did this to further develop our method and included two periods of varied  
6 hospital occupancy (i.e., fall and winter). A discrete high-intensity data collection period would likely  
7 have yielded similar results and provided rich institutional learnings. Although we asked attending  
8 physicians to consider only data at the time of initial assessment, their decision regarding  
9 avoidability may have been subject to bias. Attending physicians had more information when judging  
10 avoidability than residents at the time of admission, which could bias our initial screen toward a  
11 higher rate of avoidable admissions. This was mitigated through case review, debriefs, and research  
12 team deliberations. Lastly, institutions might view reducing 11% of GIM admissions (i.e., 1 in 9 as  
13 PAAs) as too small a number to warrant intervention or that multiple interventions, spanning various  
14 aspects of PAAs would be needed to accomplish such a change. However, we believe our method  
15 will help organizations determine their own rate of PAAs and facilitate discussion about process  
16 improvements and potential QI interventions.  
17  
18  
19  
20  
21  
22  
23  
24  
25  
26  
27  
28  
29  
30  
31  
32  
33  
34  
35

## 36 **CONCLUSION**

37  
38  
39  
40 We developed a novel, prospective method of active surveillance and case-ascertainment  
41 for potentially avoidable admissions. We found that 1 in 9 admissions to GIM were potentially  
42 avoidable and characterized contributing provider and system factors to inform local QI and medical  
43 education ideas. Our method could be applied at other healthcare institutions to better understand  
44 their rate of PAAs and local contributing factors to help inform potential interventions to alleviate  
45 hospital overcrowding.  
46  
47  
48  
49  
50  
51  
52  
53  
54  
55  
56  
57  
58  
59  
60

1  
2  
3 **AUTHORSHIP CONTRIBUTIONS**  
4

5  
6 Concept and design: AMC, UP, ES, EE, AW, KGS, LS, BMW, SS  
7

8  
9 Acquisition, analysis, or interpretation of data: AMC, UP, ES, EE, AW, KGS, LS, BMW, SS  
10

11 Drafting of the manuscript: AMC  
12

13 Critical revision of the manuscript for important intellectual content: AC, EE, AW, KGS, LS, BMW, SS  
14  
15

16  
17 **CONFLICT OF INTEREST STATEMENT**  
18

19  
20 None to declare.  
21  
22

23  
24  
25  
26  
27  
28  
29  
30  
31  
32  
33  
34  
35  
36  
37  
38  
39  
40  
41  
42  
43  
44  
45  
46  
47  
48  
49  
50  
51  
52  
53  
54  
55  
56  
57  
58  
59  
60

Confidential

## REFERENCES

1. Verma AA, Guo Y, Kwan JL, Lapointe-Shaw L, Rawal S, Tang T, et al. Prevalence and Costs of Discharge Diagnoses in Inpatient General Internal Medicine: a Multi-center Cross-sectional Study. *Journal of General Internal Medicine*. 2018;
2. Verma AA, Guo Y, Kwan JL, Lapointe-Shaw L, Rawal S, Tang T, et al. Characteristics of short general internal medicine hospital stays: a multicentre cross-sectional study. *CMAJ Open*. 2019;
3. Canadian Institute for Health Information. National Health Expenditure Trends , 1975 to 2016. Canadian Institute for Health Information Report. 2016.
4. National Health Expenditure Trends, 2021 — Snapshot | CIHI [Internet]. [cited 2021 Nov 25]. Available from: <https://www.cihi.ca/en/national-health-expenditure-trends-2021-snapshot>
5. Verma AA, Guo Y, Kwan JL, Lapointe-Shaw L, Rawal S, Tang T, et al. Characteristics of short general internal medicine hospital stays: a multicentre cross-sectional study. *CMAJ Open*. 2019 Jan;7(1):E47–54.
6. Verma AA, Guo Y, Kwan JL, Lapointe-Shaw L, Rawal S, Tang T, et al. Patient characteristics, resource use and outcomes associated with general internal medicine hospital care: the General Medicine Inpatient Initiative (GEMINI) retrospective cohort study. *CMAJ Open*. 2017 Dec 11;5(4):E842–9.
7. Daniels LM, Sorita A, Kashiwagi DT, Okubo M, Small E, Polley EC, et al. Characterizing Potentially Preventable Admissions: A Mixed Methods Study of Rates, Associated Factors, Outcomes, and Physician Decision-Making. *Journal of General Internal Medicine*. 2018;
8. Spector WD, Limcangco R, Williams C, Rhodes W, Hurd D. Potentially Avoidable Hospitalizations for Elderly Long-stay Residents in Nursing Homes. *Medical Care*. 2013 Aug;51(8):673–81.
9. Canadian Institute for Health Information. Sources of Potentially Avoidable Emergency Department Visits. 2014; Available from: [https://secure.cihi.ca/free\\_products/ED\\_Report\\_ForWeb\\_EN\\_Final.pdf](https://secure.cihi.ca/free_products/ED_Report_ForWeb_EN_Final.pdf)
10. Ouslander JG, Lamb G, Perloe M, Givens JH, Kluge L, Rutland T, et al. Potentially avoidable hospitalizations of nursing home residents: Frequency, causes, and costs. *Journal of the American Geriatrics Society*. 2010;
11. Patel KK, Vakharia N, Pile J, Howell EH, Rothberg MB. Preventable Admissions on a General Medicine Service: Prevalence, Causes and Comparison with AHRQ Prevention Quality Indicators—A Cross-Sectional Analysis. *Journal of General Internal Medicine*. 2016;
12. Pope I, Burn H, Ismail SA, Harris T, McCoy D. A qualitative study exploring the factors influencing admission to hospital from the emergency department. *BMJ Open*. 2017;
13. Lynch B, Fitzgerald AP, Corcoran P, Buckley C, Healy O, Browne J. Drivers of potentially avoidable emergency admissions in Ireland: An ecological analysis. *BMJ Quality and Safety*. 2019;
14. Verma AA, Rawal S, Kwan JL, Razak F, Detsky AS, Guo Y, et al. Association of the Trauma of Hospitalization With 30-Day Readmission or Emergency Department Visit. *JAMA Internal Medicine*. 2019;
15. Detsky AS, Krumholz HM. Reducing the trauma of hospitalization. *JAMA - Journal of the American Medical Association*. 2014.
16. Ouslander JG, Berenson RA. Reducing unnecessary hospitalizations of nursing home residents. *New England Journal of Medicine*. 2011.
17. Daniels LM, Sorita A, Kashiwagi DT, Okubo M, Small E, Polley EC, et al. Characterizing Potentially Preventable Admissions: A Mixed Methods Study of Rates, Associated Factors, Outcomes, and Physician Decision-Making. *Journal of General Internal Medicine*. 2018 May 16;33(5):737–44.

18. Lewis Hunter AE, Spatz ES, Bernstein SL, Rosenthal MS. Factors Influencing Hospital Admission of Non-critically Ill Patients Presenting to the Emergency Department: a Cross-sectional Study. *Journal of General Internal Medicine*. 2016;
19. Baker GR. The Canadian Adverse Events Study: the incidence of adverse events among hospital patients in Canada. *Canadian Medical Association Journal*. 2004 May 25;170(11):1678–86.
20. CMG+ | CIHI [Internet]. [cited 2021 Nov 25]. Available from: <https://www.cihi.ca/en/cm+>
21. Resource Indicators: DAD Resource Intensity Weights And Expected Length Of Stay | CIHI [Internet]. [cited 2021 Nov 25]. Available from: <https://www.cihi.ca/en/resource-indicators-dad-resource-intensity-weights-and-expected-length-of-stay>
22. Wang J, Vahid S, Eberg M, Milroy S, Milkovich J, Wright FC, et al. Clearing the surgical backlog caused by COVID-19 in Ontario: A time series modelling study. *CMAJ [Internet]*. 2020 Nov 2 [cited 2021 Nov 25];192(44):E1347–56. Available from: <https://www.cmaj.ca/content/192/44/E1347>
23. OMA estimates pandemic backlog of almost 16 million health-care services [Internet]. [cited 2021 Nov 25]. Available from: <https://www.oma.org/newsroom/news/2021/jun/oma-estimates-pandemic-backlog-of-almost-16-million-health-care-services/>
24. Reducing Hospital Admissions from the Emergency Department [Internet]. [cited 2021 Nov 25]. Available from: <https://hbr.org/2013/10/reducing-unnecessary-admissions-of-general-medicine-patients-from-the-emergency-department>
25. Tonelli MR, Upshur REG. A Philosophical Approach to Addressing Uncertainty in Medical Education. *Academic Medicine*. 2019 Apr;94(4):507–11.
26. Cooke S, Lemay J-F. Transforming Medical Assessment. *Academic Medicine*. 2017 Jun;92(6):746–51.
27. Rising KL, Powell RE, Cameron KA, Salzman DH, Papanagnou D, Doty AMB, et al. Development of the Uncertainty Communication Checklist: A Patient-Centered Approach to Patient Discharge From the Emergency Department. *Academic Medicine*. 2020 Jul 25;95(7):1026–34.
28. Dharmarajan K, Qin L, Bierlein M, Choi JES, Lin Z, Desai NR, et al. Outcomes after observation stays among older adult Medicare beneficiaries in the USA: retrospective cohort study. *BMJ*. 2017 Jun 20;j2616.
29. Jeppesen E, Brurberg KG, Vist GE, Wedzicha JA, Wright JJ, Greenstone M, et al. Hospital at home for acute exacerbations of chronic obstructive pulmonary disease. *Cochrane Database of Systematic Reviews*. 2012 May 16;
30. Dhalla IA, O'Brien T, Morra D, Thorpe KE, Wong BM, Mehta R, et al. Effect of a Postdischarge Virtual Ward on Readmission or Death for High-Risk Patients. *JAMA*. 2014 Oct 1;312(13):1305.
31. Conley J, O'Brien CW, Leff BA, Bolen S, Zulman D. Alternative Strategies to Inpatient Hospitalization for Acute Medical Conditions. *JAMA Internal Medicine*. 2016 Nov 1;176(11):1693.
32. Galipeau J, Pussegoda K, Stevens A, Brehaut JC, Curran J, Forster AJ, et al. Effectiveness and Safety of Short-stay Units in the Emergency Department: A Systematic Review. *Academic Emergency Medicine*. 2015 Aug;22(8):893–907.
33. Wong BM, Dyal S, Etchells EE, Knowles S, Gerard L, Diamantouros A, et al. Application of a trigger tool in near real time to inform quality improvement activities: a prospective study in a general medicine ward. *BMJ Quality & Safety*. 2015 Apr;24(4):272–81.

**Table 1: Baseline Characteristics of Cohort, Healthcare Utilization and Disposition**

|                                          | Total Cohort | Non-Avoidable | Avoidable   | P-value |
|------------------------------------------|--------------|---------------|-------------|---------|
| <b>Total Cases (n)</b>                   | 601          | 534           | 67          |         |
| <b>Age (Mean, SD)</b>                    | 71 (18)      | 72 (18)       | 65 (20)     | 0.007   |
| <b>Female, n (%)</b>                     | 316 (53%)    | 255 (48%)     | 37 (55%)    | 0.646   |
| <b>Time of Admission, n (%)</b>          |              |               |             |         |
| Daytime <sup>a</sup>                     | 83 (14%)     | 76 (14%)      | 7 (10%)     | 0.590   |
| Evening <sup>b</sup>                     | 190 (32%)    | 170 (31%)     | 20 (30%)    |         |
| Night <sup>c</sup>                       | 328 (55%)    | 288 (54%)     | 40 (60%)    |         |
| <b>Day of Week, n (%)</b>                |              |               |             |         |
| Weekday <sup>d</sup>                     | 393 (65%)    | 352 (66%)     | 41 (61%)    | 0.444   |
| Weekend <sup>e</sup>                     | 208 (35%)    | 182 (34%)     | 26 (39%)    |         |
| <b>CIHI Case Mix Groups</b>              | 1.09 (1.34)  | 1.16 (1.34)   | 0.49 (1.02) | <0.001  |
| <b>LOS (h) (median, IQR)</b>             | 95 (159)     | 105 (158)     | 29 (91)     | <0.001  |
| <b>RIW Score</b>                         | 1.42 (2.54)  | 1.50 (2.68)   | 0.72 (0.44) | <0.001  |
| <b>Healthcare Utilization</b>            |              |               |             |         |
| CT (Head)                                | 47 (8%)      | 4 (8%)        | 3 (4%)      | 0.280   |
| MRI Brain/Spine                          | 61 (10%)     | 50 (9%)       | 11 (17%)    | 0.071   |
| <b>Discharge Destination<sup>f</sup></b> |              |               |             |         |
| Home with supports                       | 123          | 112           | 11          | 0.008   |
| Home without supports                    | 312          | 271           | 41          |         |
| Assisted Living                          | 51           | 43            | 8           |         |
| Rehab                                    | 61           | 57            | 4           |         |
| Palliative Care Unit                     | 13           | 13            | 0           |         |
| Transitional Unit                        | 9            | 9             | 0           |         |
| Another Care Facility                    | 6            | 6             | 0           |         |
| Deceased                                 | 16           | 16            | 0           |         |
| Against Medical Advice                   | 10           | 7             | 3           |         |

<sup>a</sup>Daytime (0800 – 1659), <sup>b</sup>Evening (1700 – 2400), <sup>c</sup>Night (0001 – 0759), <sup>d</sup>Weekday (M0800 – F1700), <sup>e</sup>Weekend (F1701 – M0759). No statistically significant findings comparing daytime vs. evening/night or typical working hours vs. evening & weekend. <sup>f</sup>Chi-square test compared Home/Home with Supports/NH/RH/Group Home versus all other locations (Rehab, Transitional Unit, etc.)

**Table 2: Factors Associated with Potentially Avoidable Admissions**

| <b>Factor</b>                                                                               | <b>N</b> |
|---------------------------------------------------------------------------------------------|----------|
| <b>Health System</b>                                                                        |          |
| Poor Access to Urgent Outpatient Investigations                                             | 10       |
| Subspecialist request to admit                                                              | 22       |
| Government directive of 4-hour limit for admission decision-making                          | 28       |
| Overcrowding in the ED                                                                      | 13       |
| Lack of Available Services to Determine Suitability of Safe Discharge                       | 10       |
| Lack of Timely Access to Community Based Resources                                          | 4        |
| Unavailable Specialist / Ancillary Care                                                     | 8        |
| <b>Provider</b>                                                                             |          |
| Diagnostic and Therapeutic Uncertainty                                                      | 38       |
| Perceived need for short-term patient monitoring                                            | 32       |
| High number of consults during shift, admitted to increase efficiency with patient workload | 12       |
| Resident-Faculty Culture (Admitting in order to avoid overnight call to staff physician)    | 4        |
| Uncertainty Regarding Patient Preference                                                    | 2        |
| <b>Patient &amp; Family</b>                                                                 |          |
| Frailty (Physical/Cognitive)                                                                | 16       |
| Socially Isolated; Lack of social support; unsafe to discharge without access to caregivers | 4        |
| Lack of Access to Housing / Transportation Home                                             | 1        |
| Health literacy: Language Barrier = no translator or family to discuss treatment plan       | 10       |
| Mental illness / substance use; concern re: risk of harm                                    | 1        |



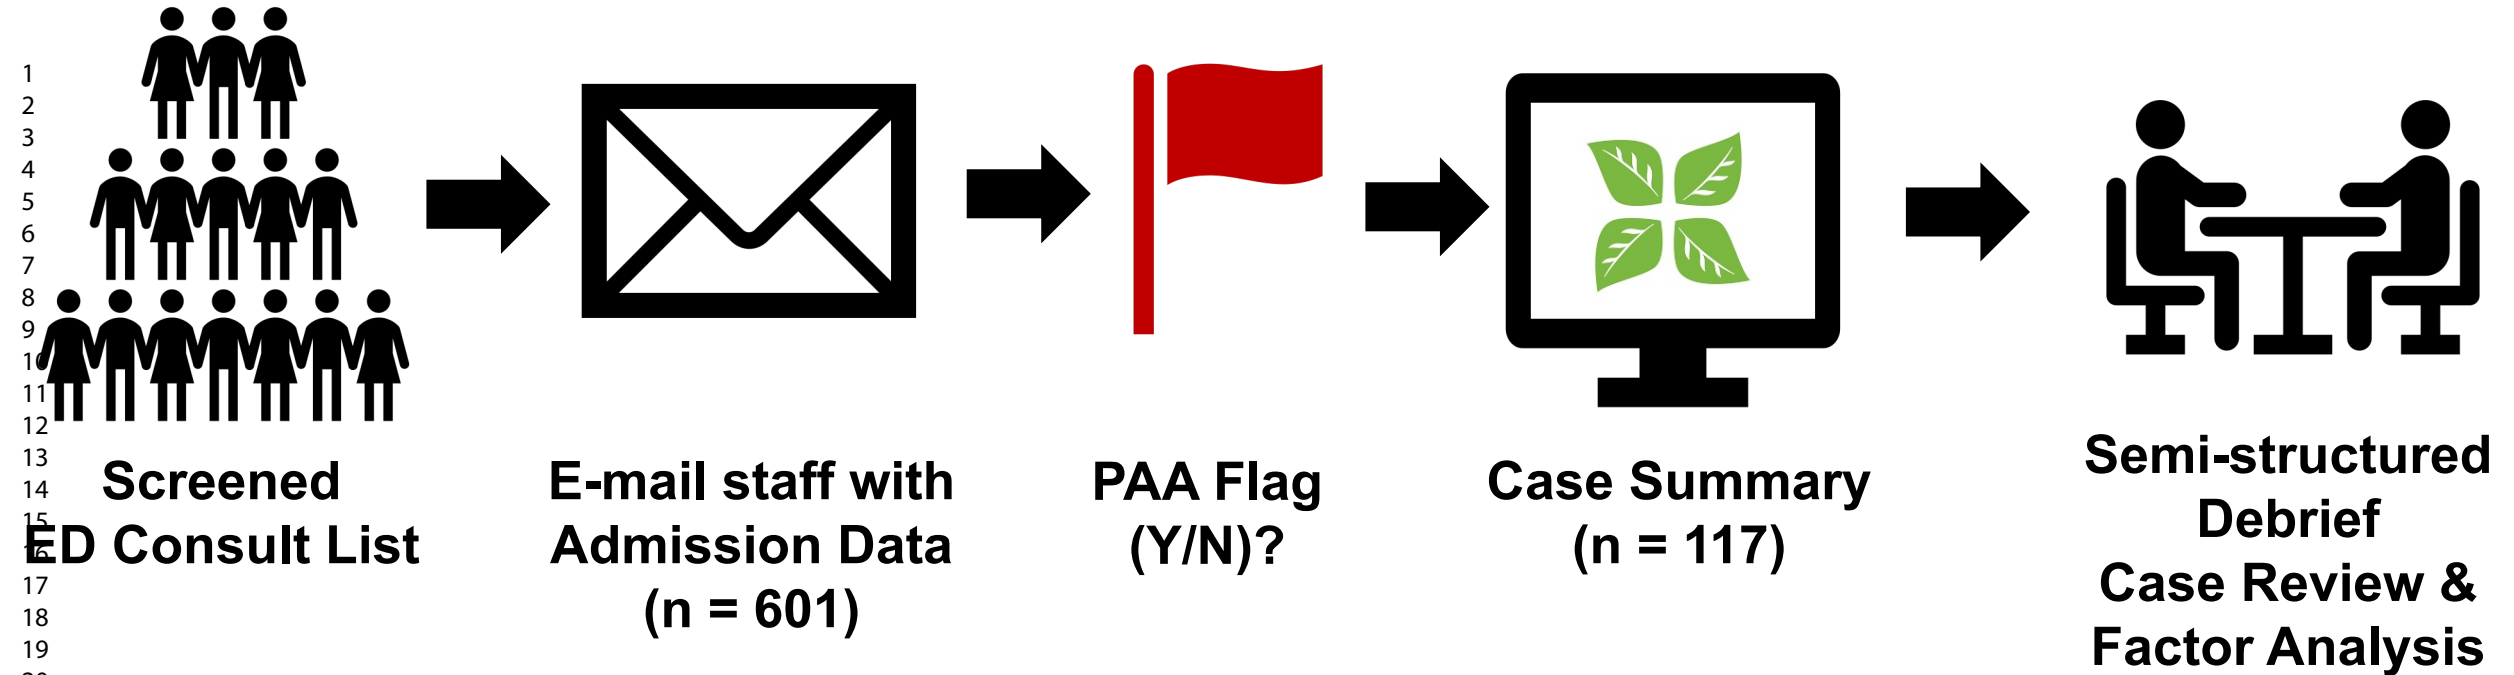

### 1. Assign Avoidability Score

- Likert Scale (1 to 4) where PAA score of 3 or 4 indicated an avoidable admission

### 2. If score $\geq 3$ , discussed contributing factors

- System Factors
- Provider Factors
- Patient Factors

## Appendix 1: Health System, Patient and Provider Factors for Potentially Avoidable Admissions

### Health System Factors

- Poor Access to Urgent Outpatient Investigations (admitted to shorten diagnostic process or circumvent outpatient referral process)
- Subspecialist request to admit
- Government directive of 4-hour limit for admission decision-making
- Overcrowding in the ED = Patient admitted to free-up space in an overcrowded ED
- Lack of Available Services to Determine Suitability of Safe Discharge and Outpatient Allied Health Follow Up (PT/OT/SW/GEM RN)
- Lack of Timely Access to Community Based Resources (to Address Ongoing Concerns regarding Medical/Palliative, Functional, Social)
- Unavailable Specialist / Ancillary Care
- Delay in Urgent GIM Clinic Appointment

### Provider Factors

- Diagnostic & Therapeutic Uncertainty
- Perceived need for short-term patient monitoring
- High number of consults during shift, admitted to increase efficiency with patient workload
- Resident-Faculty Culture (Admitting in order to avoid an overnight call to staff physician)
- Uncertainty Regarding Patient Preference (Lack of collateral; admitted without being able to align with goals of care)
- Insufficient Workforce (Insufficient human resources to manage workload)

### Patient & Family Factors

- Frailty (Physical/Cognitive); admitted due poor mobility/cognitive impairment; deemed unsafe to send home at time of referral
- Socially Isolated; Lack of social support available to patient; unsafe to discharge without access to caregivers
- Lack of Access to Housing / Transportation Home
- Health literacy: Language Barrier = no translator or family discuss treatment plan
- Mental illness / substance use = admission with recent history of mental illness and/or substance use; risk of self-harm/neglect
- Patient/Family Preference = Patient and/or substitute decision-makers insisting on admission
